# Supplementary material for: Identification of Multiple Hub Genes and Pathways in Hepatocellular Carcinoma: A Bioinformatics Analysis
Source: Biomed Res Int. 2021 Jul 12;2021:8849415. doi: 10.1155/2021/8849415 (PMC8292096; doi:10.1155/2021/8849415)
Supplement: Supplementary Materials — See Table S1 for the connection between clinicopathological parameters and expression levels of ten hub genes. [file 8849415.f1.pdf]

| Parameters                               | CYP3A4 |               |       | UGT1A6 |    |              | AOX1  |   |    | UGT1A4       |       |   | UGT2B15 |              |       | CK1 |    |             | CCNB1 |   |    | MAD2L1      |       |   | CCNB2 |             |       | CDC20 |    |              |       |   |
|------------------------------------------|--------|---------------|-------|--------|----|--------------|-------|---|----|--------------|-------|---|---------|--------------|-------|-----|----|-------------|-------|---|----|-------------|-------|---|-------|-------------|-------|-------|----|--------------|-------|---|
|                                          | n      | Means         | SD    | P      | n  | Means        | SD    | P | n  | Means        | SD    | P | n       | Means        | SD    | P   | n  | Means       | SD    | P | n  | Means       | SD    | P | n     | Means       | SD    | P     | n  | Means        | SD    | P |
| <b>Gender</b>                            |        |               |       |        |    |              |       |   |    |              |       |   |         |              |       |     |    |             |       |   |    |             |       |   |       |             |       |       |    |              |       |   |
| Male                                     | 46     | -8.407±4.404  |       |        | 46 | -0.754±3.488 |       |   | 46 | -6.212±3.216 |       |   | 46      | -3.586±3.448 |       |     | 45 | 2.676±2.017 |       |   | 45 | 1.734±1.866 |       |   | 46    | 2.939±1.818 |       |       | 45 | 0.842±2.144  |       |   |
| Female                                   | 13     | -9.382±6.236  | 0.605 |        | 13 | -1.007±3.965 | 0.824 |   | 13 | -7.533±4.757 | 0.361 |   | 13      | -6.493±5.122 | 0.775 |     | 13 | 2.336±2.356 | 0.609 |   | 12 | 1.802±2.421 | 0.917 |   | 13    | 3.146±1.957 | 0.723 |       | 11 | 0.499±2.191  | 0.638 |   |
| <b>Age(years)</b>                        |        |               |       |        |    |              |       |   |    |              |       |   |         |              |       |     |    |             |       |   |    |             |       |   |       |             |       |       |    |              |       |   |
| >60                                      | 30     | -7.991±5.182  |       |        | 30 | -0.804±3.858 |       |   | 30 | -6.304±4.023 |       |   | 29      | -8.444±4.295 |       |     | 30 | 2.896±2.114 |       |   | 30 | 1.997±1.898 |       |   | 30    | 3.241±1.678 |       |       | 29 | 0.811±1.912  |       |   |
| ≤60                                      | 29     | -9.274±4.416  | 0.311 |        | 29 | -0.816±3.300 | 0.990 |   | 29 | -6.710±3.178 | 0.669 |   | 29      | -5.449±4.007 | 0.581 |     | 28 | 2.282±2.034 | 0.265 |   | 27 | 1.472±2.050 | 0.320 |   | 29    | 2.720±1.977 | 0.279 |       | 30 | 0.736±2.393  | 0.898 |   |
| <b>Smoking</b>                           |        |               |       |        |    |              |       |   |    |              |       |   |         |              |       |     |    |             |       |   |    |             |       |   |       |             |       |       |    |              |       |   |
| Yes                                      | 22     | -8.308±4.290  |       |        | 22 | -0.461±3.482 |       |   | 22 | -6.178±3.258 |       |   | 22      | -5.372±4.367 |       |     | 21 | 2.791±1.827 |       |   | 22 | 2.007±1.490 |       |   | 22    | 3.262±1.621 |       |       | 22 | 1.046±1.960  |       |   |
| No                                       | 37     | -8.809±5.162  | 0.703 |        | 37 | -1.017±3.643 | 0.567 |   | 37 | -6.697±3.830 | 0.597 |   | 37      | -5.009±4.032 | 0.748 |     | 37 | 2.491±2.228 | 0.602 |   | 35 | 1.586±2.227 | 0.437 |   | 37    | 2.620±1.953 | 0.375 |       | 34 | 0.599±2.256  | 0.450 |   |
| <b>Drinking</b>                          |        |               |       |        |    |              |       |   |    |              |       |   |         |              |       |     |    |             |       |   |    |             |       |   |       |             |       |       |    |              |       |   |
| Yes                                      | 21     | -8.278±4.146  |       |        | 21 | -0.578±3.689 |       |   | 21 | -5.801±3.351 |       |   | 21      | -5.218±4.464 |       |     | 20 | 2.812±1.935 |       |   | 21 | 1.700±1.852 |       |   | 21    | 3.066±1.757 |       |       | 21 | 1.022±2.087  |       |   |
| No                                       | 38     | -8.812±5.203  | 0.688 |        | 38 | -0.938±3.536 | 0.713 |   | 38 | -6.892±3.727 | 0.270 |   | 37      | -5.106±3.988 | 0.922 |     | 38 | 2.488±2.170 | 0.577 |   | 36 | 1.777±2.063 | 0.889 |   | 38    | 2.940±1.898 | 0.803 |       | 35 | 0.627±2.184  | 0.508 |   |
| <b>Family history</b>                    |        |               |       |        |    |              |       |   |    |              |       |   |         |              |       |     |    |             |       |   |    |             |       |   |       |             |       |       |    |              |       |   |
| Positive                                 | 7      | -10.361±4.580 |       |        | 7  | 0.847±2.788  |       |   | 7  | -7.837±3.778 |       |   | 7       | -8.843±4.297 |       |     | 7  | 2.742±1.660 |       |   | 6  | 1.495±1.265 |       |   | 7     | 2.727±1.732 |       |       | 6  | 0.289±1.967  |       |   |
| Negative                                 | 52     | -8.388±4.849  | 0.314 |        | 52 | -1.033±3.620 | 0.193 |   | 52 | -6.324±3.583 | 0.302 |   | 51      | -5.188±4.147 | 0.838 |     | 51 | 2.580±2.145 | 0.849 |   | 52 | 1.778±2.045 | 0.743 |   | 52    | 3.019±1.861 | 0.696 |       | 50 | 0.833±2.168  | 0.561 |   |
| <b>Body Mass Index(kg/m<sup>2</sup>)</b> |        |               |       |        |    |              |       |   |    |              |       |   |         |              |       |     |    |             |       |   |    |             |       |   |       |             |       |       |    |              |       |   |
| ≥27.5                                    | 4      | -6.737±6.256  |       |        | 4  | -3.694±3.526 |       |   | 4  | -6.990±5.566 |       |   | 4       | -6.245±6.285 |       |     | 4  | 1.217±3.134 |       |   | 4  | 0.421±2.088 |       |   | 4     | 1.957±2.933 |       |       | 4  | -0.339±2.761 |       |   |
| <27.5                                    | 54     | -8.810±4.775  | 0.414 |        | 54 | -0.693±3.470 | 0.101 |   | 54 | -6.567±3.453 | 0.821 |   | 53      | -5.170±3.961 | 0.617 |     | 53 | 2.717±2.002 | 0.170 |   | 52 | 1.857±1.964 | 0.166 |   | 54    | 3.091±1.748 | 0.237 |       | 51 | 0.883±2.106  | 0.278 |   |
| <b>Maximum tumor size(cm)</b>            |        |               |       |        |    |              |       |   |    |              |       |   |         |              |       |     |    |             |       |   |    |             |       |   |       |             |       |       |    |              |       |   |
| >5                                       | 30     | -8.970±4.830  |       |        | 30 | -1.171±3.895 |       |   | 30 | -6.598±3.871 |       |   | 30      | -4.471±4.022 |       |     | 29 | 2.561±2.119 |       |   | 30 | 1.671±2.035 |       |   | 30    | 2.949±1.760 |       |       | 29 | 0.888±2.193  |       |   |
| ≤5                                       | 28     | -8.065±4.844  | 0.479 |        | 28 | -0.222±3.049 | 0.308 |   | 28 | -6.164±3.174 | 0.644 |   | 28      | -4.614±3.914 | 0.347 |     | 28 | 2.561±2.075 | 1.000 |   | 27 | 1.809±1.971 | 0.799 |   | 28    | 2.935±1.916 | 0.977 |       | 26 | 0.605±2.137  | 0.630 |   |
| <b>histological differentiation</b>      |        |               |       |        |    |              |       |   |    |              |       |   |         |              |       |     |    |             |       |   |    |             |       |   |       |             |       |       |    |              |       |   |
| poor differentiated                      | 13     | -11.488±3.890 |       |        | 13 | -1.596±3.462 |       |   | 13 | -8.498±2.247 |       |   | 13      | -7.541±3.929 |       |     | 13 | 3.606±1.832 |       |   | 12 | 1.891±1.788 |       |   | 13    | 3.647±1.753 |       |       | 12 | 1.248±1.835  |       |   |
| well to moderate                         | 41     | -7.520±4.563  | 0.007 |        | 41 | -0.199±3.238 | 0.188 |   | 41 | -4.553±3.288 | 0.003 |   | 41      | -4.182±3.630 | 0.006 |     | 40 | 2.321±1.880 | 0.036 |   | 40 | 1.611±1.954 | 0.659 |   | 41    | 2.698±1.784 | 0.099 |       | 39 | 0.507±2.370  | 0.265 |   |
| <b>Tumor necrosis</b>                    |        |               |       |        |    |              |       |   |    |              |       |   |         |              |       |     |    |             |       |   |    |             |       |   |       |             |       |       |    |              |       |   |
| Positive                                 | 23     | -10.075±4.620 |       |        | 23 | -1.054±4.140 |       |   | 23 | -6.730±3.910 |       |   | 23      | -5.769±4.072 |       |     | 23 | 2.628±1.928 |       |   | 22 | 1.827±1.565 |       |   | 23    | 3.030±1.612 |       |       | 22 | 0.960±1.953  |       |   |
| Negative                                 | 36     | -7.693±4.781  | 0.064 |        | 36 | -0.654±3.195 | 0.678 |   | 36 | -6.359±4.023 | 0.703 |   | 35      | -4.737±4.171 | 0.356 |     | 35 | 2.688±2.266 | 0.006 |   | 35 | 1.699±2.209 | 0.800 |   | 36    | 2.956±1.969 | 0.881 |       | 34 | 0.655±2.269  | 0.606 |   |
| <b>Satellite lesions</b>                 |        |               |       |        |    |              |       |   |    |              |       |   |         |              |       |     |    |             |       |   |    |             |       |   |       |             |       |       |    |              |       |   |
| Positive                                 | 19     | -10.259±4.709 |       |        | 19 | -1.860±4.188 |       |   | 19 | -7.991±3.746 |       |   | 19      | -7.035±4.500 |       |     | 19 | 3.160±2.120 |       |   | 18 | 2.303±1.834 |       |   | 19    | 3.685±1.387 |       |       | 18 | 1.486±2.146  |       |   |
| Negative                                 | 40     | -7.844±4.736  | 0.072 |        | 40 | -0.311±3.162 | 0.120 |   | 40 | -5.797±3.359 | 0.028 |   | 39      | -4.226±3.649 | 0.014 |     | 39 | 2.866±2.981 | 0.029 |   | 39 | 1.493±2.002 | 0.151 |   | 40    | 2.700±1.964 | 0.083 |       | 38 | 0.438±2.370  | 0.087 |   |
| <b>Vascular cancer embolus</b>           |        |               |       |        |    |              |       |   |    |              |       |   |         |              |       |     |    |             |       |   |    |             |       |   |       |             |       |       |    |              |       |   |
| Positive                                 | 18     | -10.070±3.961 |       |        | 18 | -0.267±3.363 |       |   | 18 | -7.715±2.599 |       |   | 18      | -8.044±4.064 |       |     | 18 | 2.440±1.998 |       |   | 18 | 2.076±2.288 |       |   | 18    | 3.222±1.904 |       |       | 18 | 0.746±2.380  |       |   |
| Negative                                 | 41     | -7.986±5.069  | 0.127 |        | 41 | -1.049±3.663 | 0.442 |   | 41 | -5.972±3.879 | 0.049 |   | 40      | -4.951±4.173 | 0.420 |     | 40 | 2.671±2.139 | 0.698 |   | 41 | 1.621±1.849 | 0.438 |   | 41    | 2.880±1.817 | 0.514 |       | 41 | 0.785±2.073  | 0.952 |   |
| <b>pT</b>                                |        |               |       |        |    |              |       |   |    |              |       |   |         |              |       |     |    |             |       |   |    |             |       |   |       |             |       |       |    |              |       |   |
| T3-4                                     | 24     | -9.634±4.703  |       |        | 24 | -1.657±4.077 |       |   | 24 | -7.058±3.534 |       |   | 24      | -6.109±4.397 |       |     | 24 | 2.920±2.225 |       |   | 23 | 1.986±1.972 |       |   | 24    | 3.176±1.890 |       |       | 23 | 1.114±2.252  |       |   |
| T0-2                                     | 35     | -7.928±4.847  | 0.184 |        | 35 | -0.229±3.093 | 0.132 |   | 35 | -6.056±3.639 | 0.252 |   | 34      | -4.467±3.848 | 0.137 |     | 35 | 3.056±3.216 | 0.085 |   | 34 | 1.588±1.919 | 0.459 |   | 35    | 2.854±1.811 | 0.512 |       | 33 | 0.539±2.055  | 0.327 |   |
| <b>pN</b>                                |        |               |       |        |    |              |       |   |    |              |       |   |         |              |       |     |    |             |       |   |    |             |       |   |       |             |       |       |    |              |       |   |
| N1                                       | 5      | -13.176±2.028 |       |        | 5  | -3.414±3.201 |       |   | 5  | -8.918±1.904 |       |   | 5       | -8.653±2.997 |       |     | 5  | 2.501±1.078 |       |   | 5  | 0.872±1.000 |       |   | 5     | 2.608±1.277 |       |       | 5  | 0.182±1.041  |       |   |
| N0                                       | 54     | -8.200±4.796  | 0.002 |        | 54 | -0.569±3.525 | 0.088 |   | 54 | -6.280±3.656 | 0.119 |   | 53      | -4.816±4.086 | 0.046 |     | 54 | 3.437±3.761 | 0.913 |   | 52 | 1.833±2.026 | 0.302 |   | 54    | 3.020±1.883 | 0.635 |       | 51 | 0.833±2.214  | 0.277 |   |
| <b>Cirrhosis</b>                         |        |               |       |        |    |              |       |   |    |              |       |   |         |              |       |     |    |             |       |   |    |             |       |   |       |             |       |       |    |              |       |   |
| Yes                                      | 35     | -8.036±4.326  |       |        | 35 | 0.293±2.827  |       |   | 35 | -4.252±3.749 |       |   | 35      | -3.333±3.417 |       |     | 35 | 2.232±1.929 |       |   | 35 | 1.674±1.857 |       |   | 35    | 3.157±1.645 |       |       | 33 | 1.215±2.142  |       |   |
| No                                       | 24     | -9.475±5.451  | 0.264 |        | 24 | -2.419±3.958 | 0.006 |   | 24 | -7.639±4.034 | 0.057 |   | 23      | -6.508±4.383 | 0.041 |     | 24 | 2.512±2.283 | 0.791 |   | 23 | 1.034±1.848 | 0.023 |   | 24    | 2.734±2.091 | 0.573 |       | 23 | 0.143±2.009  | 0.064 |   |
| <b>HbsAg</b>                             |        |               |       |        |    |              |       |   |    |              |       |   |         |              |       |     |    |             |       |   |    |             |       |   |       |             |       |       |    |              |       |   |
| Present                                  | 40     | -8.565±4.468  |       |        | 40 | -0.351±3.192 |       |   | 40 | -6.436±3.275 |       |   | 40      | -5.201±4.147 |       |     | 40 | 3.634±3.316 |       |   | 39 | 1.915±1.895 |       |   | 40    | 3.049±1.675 |       |       | 38 | 0.966±2.093  |       |   |
| Absent                                   | 19     | -8.742±5.628  | 0.897 |        | 19 | -1.777±4.171 | 0.153 |   | 19 | -6.647±4.319 | 0.836 |   | 18      | -5.024±4.202 | 0.882 |     | 19 | 2.760±2.510 | 0.686 |   | 18 | 1.387±2.139 | 0.352 |   | 19    | 2.848±2.176 | 0.697 |       | 18 | 0.372±2.235  | 0.336 |   |
| <b>Serum AFP (μg/L)</b>                  |        |               |       |        |    |              |       |   |    |              |       |   |         |              |       |     |    |             |       |   |    |             |       |   |       |             |       |       |    |              |       |   |
| >20                                      | 22     | -8.460±4.412  |       |        | 22 | 0.341±2.794  |       |   | 22 | -6.106±3.481 |       |   | 22      | -4.795±3.628 |       |     | 21 | 3.025±1.987 |       |   | 21 | 2.139±2.190 |       |   | 22    | 3.176±1.753 |       |       | 21 | 1.399±2.232  |       |   |
| ≤20                                      | 36     | -8.737±5.179  | 0.836 |        | 36 | -1.582±3.839 | 0.032 |   | 36 | -6.712±3.756 | 0.543 |   | 35      | -5.434±4.485 | 0.576 |     | 36 | 2.346±2.149 | 0.242 |   | 35 | 1.430±1.768 | 0.190 |   | 36    | 2.840±1.913 | 0.507 |       | 34 | 0.271±1.895  | 0.050 |   |
| <b>Serum CEA (μg/L)</b>                  |        |               |       |        |    |              |       |   |    |              |       |   |         |              |       |     |    |             |       |   |    |             |       |   |       |             |       |       |    |              |       |   |
| >5                                       | 7      | -8.898±6.038  |       |        | 7  | -0.658±3.694 |       |   | 7  | -6.670±4.546 |       |   | 7       | -5.874±4.308 |       |     | 7  | 2.438±2.005 |       |   | 7  | 2.794±2.372 |       |   | 7     | 4.019±1.596 |       |       | 7  | 2.083±1.966  |       |   |
